# Supplementary figures and images for: Differential Protein Expression in Striatal D1- and D2-Dopamine Receptor-Expressing Medium Spiny Neurons
Source: MDPI journal article supplement (doi:10.3390/proteomes8040027), 2020-10-13

**D1 D2**

**250 kDa**

**150 kDa**

**75 kDa**

**50 kDa**

**37 kDa**

**25 kDa**

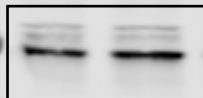

**GFP L10a (50 kDa)**

Supplement: s1 [file s1]

D1 D2

DARPP-32 (32kDa)

75kDa

25kDa

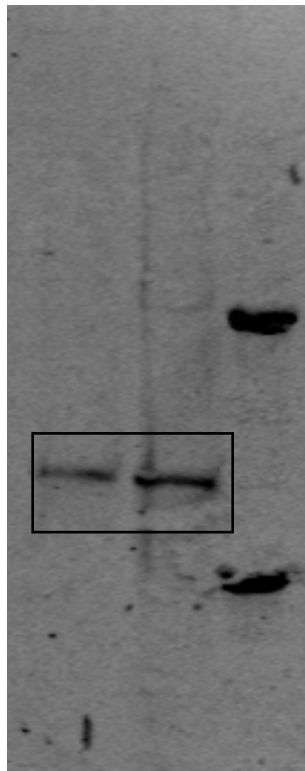

Supplement: s1 [file s1]
